# Supplementary material for: Complete ligand loss in electron ionization of the weakly bound organometallic tungsten hexacarbonyl dimer
Source: Royal Society of Chemistry journal article supplement (doi:10.1039/c6cp00558f), 2016-01-01
Supplement: c6cp00558f1.pdf [file c6cp00558f1.pdf]

## Electronic Supplementary Information

### Complete ligand loss in electron ionization of the weakly bound organometallic tungsten hexacarbonyl dimer

Michael Neustetter<sup>a</sup>, Andreas Mauracher<sup>a</sup>, Paulo Limão-Vieira<sup>\*b</sup> and Stephan Denifl<sup>\*a</sup>

<sup>a</sup> Institut für Ionenphysik und Angewandte Physik, Leopold Franzens Universität Innsbruck,  
Technikerstrasse 25, A-6020 Innsbruck, Austria.

<sup>b</sup> Laboratório de Colisões Atômicas e Moleculares, CEFITEC, Departamento de Física, Faculdade de  
Ciências e Tecnologia, Universidade NOVA de Lisboa, 2829-516 Caparica, Portugal.

\* Email: stephan.denifl@uibk.ac.at (Stephan Denifl), plimaovieira@fct.unl.pt (Paulo Limão-Vieira)

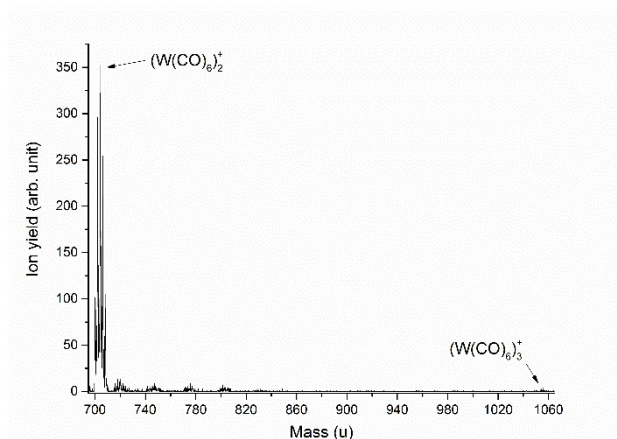

**Figure S1** Electron ionization mass spectrum of  $W(CO)_6$  in the mass range from the dimer (704 u) up to the trimer (1056 u). The spectrum shown was recorded at the electron energy of 70 eV.

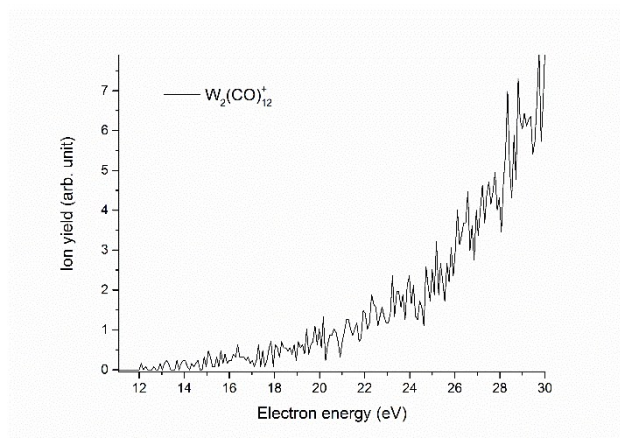

**Figure S2**  $W_2(CO)_{12}^+$  ion yield as a function of the initial electron energy.
